# Supplementary material
Source: PubMed Central journal article supplement (PMC6557145)
Supplement: jmm-67-215-s001.pdf [file jmm-67-215-s001.pdf]

## Supplemental Figures

Suppl. Table 1: ICD-9-CM Codes for Fungal Meningitis

| ICD-9-CM               | Description                      |
|------------------------|----------------------------------|
| 321.0                  | Meningitis in cryptococcal       |
| 112.83                 | Meningitis in candidiasis        |
| 114.2                  | Meningitis in coccidioidomycosis |
| 115.01, 115.11, 115.91 | Meningitis in histoplasmosis     |
